# Supplementary material for: Near-infrared fluorescence probe for the determination of acid phosphatase and imaging of prostate cancer cells
Source: Royal Society of Chemistry journal article supplement (doi:10.1039/c4an01868k), 2015-01-01
Supplement: c4an01868k1.pdf [file c4an01868k1.pdf]

## Supplementary Materials

### Near-infrared fluorescence probe for the determination of acid phosphatase and imaging of prostate cancer cells

Zihan Lin, Ziping Liu, Hao Zhang, Xingguang Su\*

*<sup>a</sup> Department of Analytical Chemistry, College of Chemistry, Jilin University, Changchun 130012,*

*PR China*

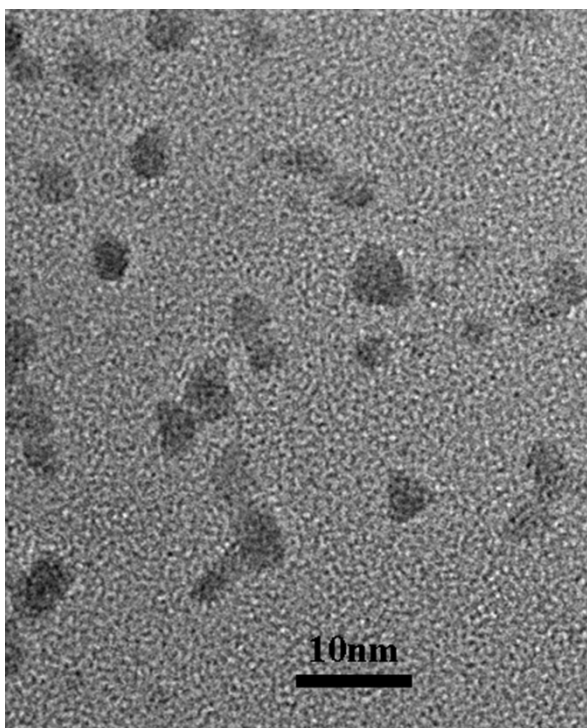

Fig. S1 The TEM image of CuInS<sub>2</sub> QDs.

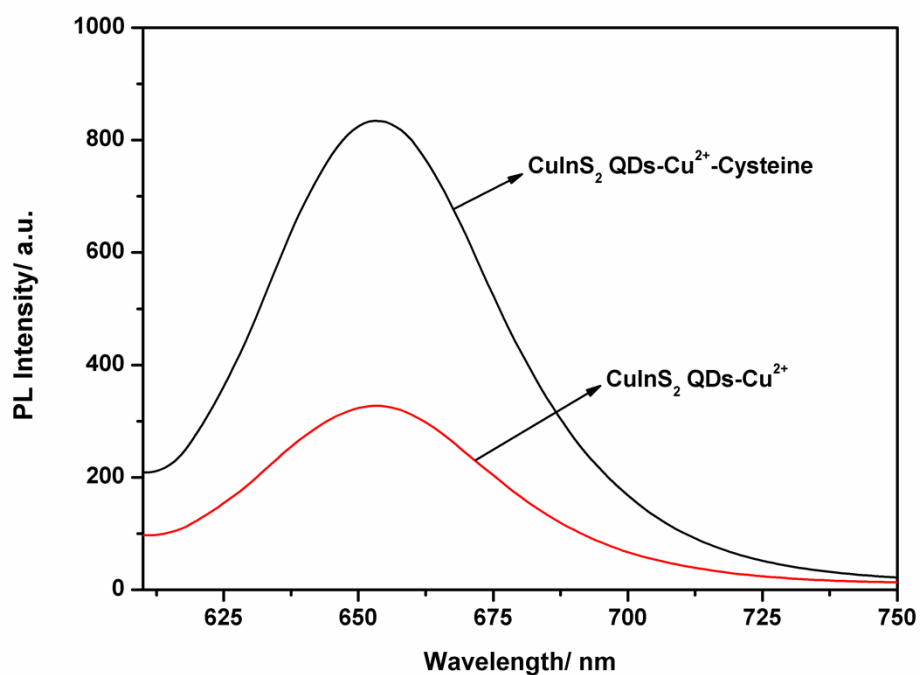

**Fig. S2** The PL emission spectra of the CuInS<sub>2</sub> QDs–25 μmol/L Cu<sup>2+</sup> and CuInS<sub>2</sub> QDs–25 μmol/L Cu<sup>2+</sup>–40 μmol/L Cysteine. Reaction conditions: 10 mmol/L Tris–HCl buffer solution (pH 5.8) at 25°C incubated for 2 minutes.

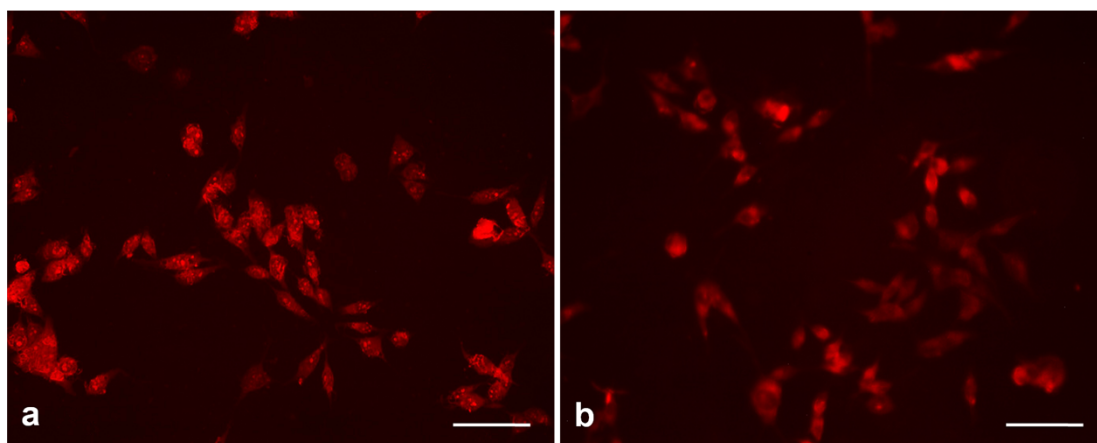

**Fig. S3** Fluorescence microscopy images of HepG2 cells (a) and PC-3M cells (b) counterstained with CuInS<sub>2</sub> QDs–Cu<sup>2+</sup>–ATP (2.26 nmol/L ). The scale bar in the fluorescence images is 20 μm.
